# Supplementary material
Source: Research Square preprint supplement (doi:10.21203/rs.3.rs-9262492/v1)
Supplement: Supplementary file 1 [file dc08b1c7302a866aa23d5d28.docx]

**COREQ Checklist**

Study Title: A closed-loop constraint model for emergency care in county-level medical alliances: A grounded theory study in a multiethnic, underdeveloped region in western China

**Domain 1: Research Team and Reflexivity**

| No. | Item | Response |
| --- | --- | --- |
| ****1. Interviewer/facilitator**** | Which author/s conducted the interviews? | Interviews were conducted by two researchers from the study team: one led the questioning, and the other recorded nonverbal cues and audio. Specific names are not listed in the manuscript, but according to the "Authors' contributions" section, Xiaorong Su, Qiming Feng, Fu Yu, and Shuyun Wang participated in the investigation. |
| ****2. Credentials**** | What were the researcher's credentials? (e.g., PhD, MD) | The specific credentials of all researchers are not detailed. The first author (Xiaorong Su) and corresponding author (Jinmin Zhao) are affiliated with Guangxi Medical University, suggesting doctoral degrees in medicine, public health, or related fields. |
| ****3. Occupation**** | What was their occupation at the time of the study? | All researchers were affiliated with Guangxi Medical University and its Health and Health Policy Research Center, working as university-based researchers or health policy scholars. |
| ****4. Gender**** | Was the researcher male or female? | The interviewer team consisted of two female and two male researchers. |
| ****5. Experience and training**** | What experience or training did the researcher have? | The research team received unified training prior to interviews (section 4.3). Three researchers independently coded data and inter-coder reliability was assessed (Cohen's kappa = 0.87), indicating familiarity with grounded theory methodology (section 4.4). |
| ****6. Relationship established**** | Was a relationship established prior to study commencement? | Not explicitly stated. However, participants were from county health bureaus and hospitals across different counties, while researchers were from a university; no close personal relationships are presumed. |
| ****7. Participant knowledge of interviewer**** | What did participants know about the researcher? (e.g., personal goals, reasons for the research) | Prior to interviews, researchers explained the study purpose, procedures, confidentiality measures, and obtained written informed consent (section 4.5). Thus, participants were informed about the study's basic information. |
| ****8. Interviewer characteristics**** | What characteristics were reported about the interviewer/facilitator? (e.g., bias, assumptions, motivations, interests in the research topic) | No personal characteristics or potential biases of interviewers are reported. The authors declare no competing interests (see "Competing interests"). As a grounded theory study, researchers aimed to maintain an open attitude without presupposing theoretical frameworks. |

**Domain 2: Study Design**

| No. | Item | Response |
| --- | --- | --- |
| ****9. Methodological orientation and theory**** | What methodological orientation was stated to underpin the study? (e.g., grounded theory, phenomenology, ethnography, case study) | This study employed classic grounded theory methodology (section 4.1). |
| ****10. Sampling**** | How were participants selected? (e.g., purposive, convenience, consecutive, snowball) | Multistage purposive sampling was used: (1) 11 pilot counties were selected; (2) within each county, one township health center was selected as a member institution; (3) key informants (health bureau officials, hospital leaders, emergency department directors/head nurses, township health center emergency managers) were invited from each selected institution (section 4.2). |
| ****11. Method of approach**** | How were participants approached? (e.g., face-to-face, telephone, mail, email) | Participants were approached through formal invitation letters sent via the county health bureau, followed by telephone confirmation to schedule interview appointments. |
| ****12. Sample size**** | How many participants were in the study? | 47 participants (see Table 1). |
| ****13. Non-participation**** | How many people refused to participate or dropped out? Reasons? | No eligible participants refused to participate or dropped out. All invited individuals agreed to be interviewed. |
| ****14. Setting of data collection**** | Where was the data collected? (e.g., home, clinic, workplace) | Interviews were conducted in independent meeting rooms (section 4.3). |
| ****15. Presence of non-participants**** | Was anyone else present besides the participants and researchers? | No non-participants were present during interviews. Interviews were conducted in private meeting rooms to ensure confidentiality. |
| ****16. Description of sample**** | What are the important characteristics of the sample? (e.g., demographic data, date) | Detailed demographic and professional characteristics are presented in Table 1, including sex, age group, professional role, and years of healthcare experience. Data collection period is not specified. |
| ****17. Interview guide**** | Were questions, prompts, guides provided by the authors? Was it pilot tested? | A semistructured interview guide was developed based on policy documents and literature review, and optimized through pilot interviews (section 4.3). The final guide covered policy context, interorganizational coordination, resource availability, and service delivery challenges. |
| ****18. Repeat interviews**** | Were repeat interviews carried out? If yes, how many? | No repeat interviews are reported. |
| ****19. Audio/visual recording**** | Did the research use audio or visual recording to collect the data? | Yes, all interviews were audio-recorded (section 4.3). |
| ****20. Field notes**** | Were field notes made during and/or after the interview? | Yes, one researcher recorded nonverbal cues, contextual observations, and immediate impressions as field notes during each interview. These notes were used to supplement audio recordings and inform subsequent interviews. |
| ****21. Duration**** | What was the duration of the interviews? | Each interview lasted approximately 45–60 minutes (section 4.3). |
| ****22. Data saturation**** | Was data saturation discussed? | Yes, theoretical saturation was tested. Analysis of later-stage interviews (approximately the final 8–10) consistently yielded no new concepts, and dedicated re-analysis of 20% of transcripts confirmed no new categories emerged, leading to the conclusion that saturation was achieved (sections 2.3 and 4.4). |
| ****23. Transcripts returned**** | Were transcripts returned to participants for comment and/or correction? | Transcripts were not returned to participants for comment or correction, as this is not a standard practice in classic grounded theory methodology, which relies on iterative analysis by researchers rather than member checking. |

**Domain 3: Analysis and Findings**

| No. | Item | Response |
| --- | --- | --- |
| ****24. Number of data coders**** | How many data coders coded the data? | Three researchers independently coded a portion of the text (section 4.4). |
| ****25. Description of the coding tree**** | Did authors provide a description of the coding tree? | The full coding tree is not presented in the main text, but Table 2 shows the correspondence between main categories and initial categories. Detailed open coding results (including initial concepts and categories) are referenced as Supplementary Table S1. |
| ****26. Derivation of themes**** | Were themes identified in advance or derived from the data? | All themes were derived inductively from the data through grounded theory analysis (sections 2.1–2.2). |
| ****27. Software**** | What software, if applicable, was used to manage the data? | NVivo 12.0 software was used for data management and coding (section 4.4). |
| ****28. Participant checking**** | Did participants provide feedback on the findings? | Participants did not provide feedback on the findings. This is consistent with classic grounded theory methodology, where theoretical development emerges from researcher analysis rather than participant validation. |
| ****29. Quotations presented**** | Were participant quotations presented to illustrate the themes/findings? Was each quotation identified? (e.g., participant number) | Yes, representative quotations are referenced throughout the results (e.g., in section 2.1 and Table 2). However, specific participant identifiers (e.g., numbers) are not attached to individual quotations. |
| ****30. Data and findings consistent**** | Was there consistency between the data presented and the findings? | Yes, each main category is supported by corresponding initial categories and representative statements, and Figure 1 and Table 2 visually represent the relationships among categories. |
| ****31. Clarity of major themes**** | Were major themes clearly presented in the findings? | Yes, Table 2 clearly presents the four main categories, their corresponding initial categories, and their core connotations. Section 2.4 elaborates on the theoretical model through a core storyline. |
| ****32. Clarity of minor themes**** | Is there a description of diverse cases or discussion of minor themes? | Minor themes (i.e., the 15 initial categories) are listed in Table 2 and specified in Figure 1. Selected minor themes (e.g., workforce shortages, cognitive bias) are discussed in depth in the Discussion section. |
